# Supplementary material
Source: PubMed Central journal article supplement (PMC9684919)
Supplement: 11244_2022_1729_MOESM1_ESM.pdf [file 11244_2022_1729_MOESM1_ESM.pdf]

## References

1. Ma Q, Liu Y, Zhu H, Zhang L, Liao X. Nanozymes in Tumor Theranostics. *Frontiers in Oncology*. 2021;11.
2. Kondoh N, Mizuno-Kamiya M, Takayama E, Kawati H, Umemura N, Yamazaki Y, Mitsudo K, Tohnai I. Perspectives of immune suppression in the tumor microenvironment promoting oral malignancy. *The open dentistry journal*. 2018;12:455.
3. Chattopadhyay I, Verma M, Panda M. Role of oral microbiome signatures in diagnosis and prognosis of oral cancer. *Technology in cancer research & treatment*. 2019;18:1533033819867354.
4. Liang M, Yan X. Nanozymes: from new concepts, mechanisms, and standards to applications. *Accounts of chemical research*. 2019;52(8):2190-200.
5. Chen X, Xing H, Zhou Z, Hao Y, Zhang X, Qi F, Zhao J, Gao L, Wang X. Nanozymes go oral: nanocatalytic medicine facilitates dental health. *Journal of Materials Chemistry B*. 2021;9(6):1491-502.
6. Mahmudunnabi RG, Farhana FZ, Kashaninejad N, Firoz SH, Shim YB, Shiddiky MJ. Nanozyme-based electrochemical biosensors for disease biomarker detection. *Analyst*. 2020;145(13):4398-420.
7. Sindhu RK, Najda A, Kaur P, Shah M, Singh H, Kaur P, Cavalu S, Jaroszuk-Sierocińska M, Rahman M. Potentiality of Nanoenzymes for Cancer Treatment and Other Diseases: Current Status and Future Challenges. *Materials*. 2021;14(20):5965.
8. Ballesteros CA, Mercante L, Alvarenga A, Facure MH, Schneider R, Correa D. Recent trends in nanozymes design: from materials and structures to environmental applications. *Materials Chemistry Frontiers*. 2021.
9. Ankathil R, Nair VS, Ravindran A, Ravindran R. Conspectus on Nanotechnology in Oral Cancer Diagnosis and Treatment. In *Multifunctional Systems for Combined Delivery, Biosensing and Diagnostics 2017* (pp. 31-49). Elsevier.
10. SureshBabu SK, Godbole JH, Vaibhaw A, Chiplunkar SV. Immunosuppressive microenvironment in oral cancer: implications for cancer immunotherapy. *Explor Immunol*. 2021;1:166-98.
11. Ma J, Qiu J, Wang S. Nanozymes for catalytic cancer immunotherapy. *ACS Applied Nano Materials*. 2020 May 18;3(6):4925-43.
12. Afrasiabi M, Seydi E, Rahimi S, Tahmasebi G, Jahanbani J, Pourahmad J. The selective toxicity of superparamagnetic iron oxide nanoparticles (SPIONs) on oral squamous cell carcinoma (OSCC) by targeting their mitochondria. *Journal of Biochemical and Molecular Toxicology*. 2021;35(6):1-8.
13. Vallabani NV, Singh S. Recent advances and future prospects of iron oxide nanoparticles in biomedicine and diagnostics. *3 Biotech*. 2018;8(6):1-23.
14. Chen MH, Chen MH, Li CY, Tung FI, Chen SY, Liu TY. Using gold-nanorod-filled mesoporous silica nanobeads for enhanced radiotherapy of oral squamous carcinoma. *Nanomaterials*. 2021;11(9):2235.

15. Healy CM, Moran GP. The microbiome and oral cancer: more questions than answers. *Oral oncology*. 2019;89:30-3.
16. Mei L, Zhu S, Liu Y, Yin W, Gu Z, Zhao Y. An overview of the use of nanozymes in antibacterial applications. *Chemical Engineering Journal*. 2021;418:129431.
17. Wang P, Min D, Chen G, Li M, Tong L, Cao Y. Inorganic Nanozymes: Prospects for Disease Treatments and Detection Applications. *Frontiers in Chemistry*. 2021;9.
18. Wang Q, Jiang J, Gao L. Catalytic antimicrobial therapy using nanozymes. *Wiley Interdisciplinary Reviews: Nanomedicine and Nanobiotechnology*. 2021:e1769.
19. Yan X, Gao L. *Nanozymology*. Springer; 2020.
20. Yu Y, Zhao S, Gu D, Zhu B, Liu H, Wu W, Wu J, Wei H, Miao L. Cerium oxide nanozyme attenuates periodontal bone destruction by inhibiting ROS-NF $\kappa$ B pathway. *Nanoscale*. 2022.
21. Lee J, Liao H, Wang Q, Han J, Han JH, Shin HE, Ge M, Park W, Li F. Exploration of nanozymes in viral diagnosis and therapy. In *Exploration 2022* (p. e20210086).
22. Kim S, Lee JW, Park YS. The application of next-generation sequencing to define factors related to oral cancer and discover novel biomarkers. *Life*. 2020;10(10):228.
23. Mascolo M, Siano M, Ilardi G, Russo D, Merolla F, Rosa GD, Staibano S. Epigenetic dysregulation in oral cancer. *International journal of molecular sciences*. 2012;13(2):2331-53.
24. Wu Y, Darland DC, Zhao JX. Nanozymes—Hitting the Biosensing “Target”. *Sensors*. 2021;21(15):5201.
25. Zhang X, Li G, Chen G, Wu D, Zhou X, Wu Y. Single-atom nanozymes: A rising star for biosensing and biomedicine. *Coordination Chemistry Reviews*. 2020;418:213376.
26. Bhattacharjee R, Tanaka S, Moriam S, Masud MK, Lin J, Alshehri SM, Ahamad T, Salunkhe RR, Nguyen NT, Yamauchi Y, Hossain MS. Porous nanozymes: the peroxidase-mimetic activity of mesoporous iron oxide for the colorimetric and electrochemical detection of global DNA methylation. *Journal of Materials Chemistry B*. 2018;6(29):4783-91.
27. Li X, Li X, Li D, Zhao M, Wu H, Shen B, Liu P, Ding S. Electrochemical biosensor for ultrasensitive exosomal miRNA analysis by cascade primer exchange reaction and MOF@ Pt@ MOF nanozyme. *Biosensors and Bioelectronics*. 2020;168:112554.
28. Jiang T, Song Y, Du D, Liu X, Lin Y. Detection of p53 protein based on mesoporous Pt–Pd nanoparticles with enhanced peroxidase-like catalysis. *ACS sensors*. 2016;1(6):717-24.
29. Tojyo I, Shintani Y, Nakanishi T, Okamoto K, Hiraishi Y, Fujita S, Enaka M, Sato F, Muragaki Y. PD-L1 expression correlated with p53 expression in oral squamous cell carcinoma. *Maxillofacial Plastic and Reconstructive Surgery*. 2019;41(1):1-6.
30. Bahrami B, Hojjat-Farsangi M, Mohammadi H, Anvari E, Ghalamfarsa G, Yousefi M, Jadidi-Niaragh F. Nanoparticles and targeted drug delivery in cancer therapy. *Immunology letters*. 2017;190:64-83.
31. Zhao S, Yu X, Qian Y, Chen W, Shen J. Multifunctional magnetic iron oxide nanoparticles: an advanced platform for cancer theranostics. *Theranostics*. 2020;10(14):6278.

32. Essawy MM, El-Sheikh SM, Raslan HS, Ramadan HS, Kang B, Talaat IM, Afifi MM. Function of gold nanoparticles in oral cancer beyond drug delivery: implications in cell apoptosis. *Oral Diseases*. 2021;27(2):251-65.
33. Sürer Şİ, Elçitepe TB, Akçay D, Daşkın E, Kocal GÇ, Alicıkuş ZA, Eskiizmir G, Yapıcı K, Başbımar Y. A Promising, Novel Radiosensitizer Nanodrug Complex for Oral Cavity Cancer: Cetuximab and Cisplatin-Conjugated Gold Nanoparticles. *Balkan Medical Journal*. 2021;38(5).
34. Wang P, Wang T, Hong J, Yan X, Liang M. Nanozymes: a new disease imaging strategy. *Frontiers in bioengineering and biotechnology*. 2020;8:15.
35. Pałasz P, Adamski Ł, Górska-Chrzastek M, Starzyńska A, Studniarek M. Contemporary diagnostic imaging of oral squamous cell carcinoma—a review of literature. *Polish Journal of Radiology*. 2017;82:193.
36. Vonk J, de Wit JG, Voskuil FJ, Witjes MJ. Improving oral cavity cancer diagnosis and treatment with fluorescence molecular imaging. *Oral diseases*. 2021;27(1):21-6.
37. Zheng W, Zhou Q, Yuan C. Nanoparticles for oral cancer diagnosis and therapy. *Bioinorganic Chemistry and Applications*. 2021;2021.
38. Shaul JL, Davis BK, Burg KJ. Regenerative engineering in maxillofacial reconstruction. *Regenerative Engineering and Translational Medicine*. 2016;2(2):55-68.
39. Rai R, Raval R, Khandeparker RV, Chidrawar SK, Khan AA, Ganpat MS. Tissue engineering: step ahead in maxillofacial reconstruction. *Journal of international oral health: JIOH*. 2015;7(9):138.
40. Huang L, Chen J, Gan L, Wang J, Dong S. Single-atom nanozymes. *Science advances*. 2019;5(5):eaav5490.
